# Supplementary material for: Iron and nickel atoms in comet atmospheres
Source: Research Square preprint supplement (doi:10.21203/rs.3.rs-101492/v1), 2020-11-10
Supplement: Supplementary file 1 [file b744f9f18f52e03190be7fa8.csv]

lambda	atom	1	2	3	4	5	6	7	8	9	10	11	12	13	14	15	16	17	18	19	20	21	22	23	24	25	26	27	28	29	30	31	32	33	34
3134.10	NiI						122 pm 122											2631 pm 1196		1210 pm 131	1052 pm 526											681 pm 227	329 pm 27
3232.93	NiI						438 pm 175		81 pm 2											1736 pm 52	1315 pm 526									300 pm 18	172 pm 27	618 pm 227	69 pm 27
3369.57	NiI	33 pm 9				336 pm 45	403 pm 175	27 pm 15					3827 pm 1196	848 pm 212		717 pm 239		1674 pm 1196		1631 pm 52	1578 pm 789	118 pm 88	503 pm 296	1271 pm 148		353 pm 66		118 pm 18		154 pm 18	300 pm 18	1090 pm 272	218 pm 90	194 pm 18
3380.57	NiI	28 pm 9				145 pm 45	263 pm 87		35 pm 2				717 pm 478	242 pm 242		598 pm 239		1196 pm 717		631 pm 131	789 pm 526	148 pm 88					71 pm 47				109 pm 27	563 pm 227	127 pm 27
3391.04	NiI					236 pm 45	192 pm 87		69 pm 69				1674 pm 1196			287 pm 119		717 pm 478		736 pm 52	578 pm 526	266 pm 118			118 pm 59						63 pm 36	263 pm 181		68 pm 22
3392.99	NiI	78 pm 9				381 pm 36	596 pm 87	26 pm 9	57 pm 4				3588 pm 2392	515 pm 303		645 pm 119		2631 pm 717		2342 pm 78	2157 pm 526	266 pm 118	1481 pm 1481	918 pm 148	41 pm 41	506 pm 99	95 pm 71	27 pm 27		281 pm 90	454 pm 27	1454 pm 181	392 pm 27	217 pm 18
3414.76	NiI	161 pm 9	54 pm 27			1000 pm 45	1280 pm 87	53 pm 9	136 pm 9		220 pm 14	284 pm 14	5263 pm 956	878 pm 121		1985 pm 239		4904 pm 717		8447 pm 78	6842 pm 526	385 pm 88	1600 pm 592	2462 pm 148	450 pm 59	610 pm 66	334 pm 47	118 pm 18	263 pm 27	672 pm 36	1290 pm 45	3909 pm 272	658 pm 36	747 pm 27
3423.71	NiI	16 pm 7					175 pm 87		86 pm 23		28 pm 14	47 pm 29			33 pm 15	311 pm 119		956 pm 478		473 pm 78	526 pm 263		592 pm 592		59 pm 59		88 pm 47	36 pm 27			136 pm 36	327 pm 181	189 pm 45	65 pm 27
3433.56	NiI	53 pm 18				202 pm 27	508 pm 87	30 pm 9	64 pm 23					333 pm 151		334 pm 119		1555 pm 717		1631 pm 105	1289 pm 263		948 pm 592	592 pm 88	65 pm 44	300 pm 99	155 pm 47	31 pm 13		118 pm 54	236 pm 36	800 pm 181	122 pm 36	84 pm 27
3437.28	NiI					211 pm 27	421 pm 175		122 pm 122					606 pm 303				717 pm 478		1026 pm 131	1078 pm 394	118 pm 88	888 pm 592	358 pm 118							109 pm 36	427 pm 181	180 pm 36	91 pm 45
3440.61	FeI	172 pm 4					35 pm 35	21 pm 9	5 pm 5		58 pm 23	38 pm 17	717 pm 717			358 pm 239		861 pm 478		1447 pm 52	1394 pm 394		888 pm 444	444 pm 148	106 pm 59	186 pm 66	81 pm 47				45 pm 36	545 pm 181	120 pm 18	363 pm 27
3440.99	FeI	52 pm 4				65 pm 27	43 pm 43		31 pm 31							167 pm 167		478 pm 239		263 pm 52	263 pm 263		770 pm 444		74 pm 59						45 pm 36	190 pm 136	44 pm 27	146 pm 27
3443.88	FeI							30 pm 12					956 pm 717					478 pm 478		105 pm 52			444 pm 444									90 pm 90
3446.26	NiI	43 pm 4	16 pm 13			238 pm 27	614 pm 175		9 pm 4				2870 pm 1435	606 pm 303		813 pm 95		1674 pm 478		2078 pm 52	1578 pm 263	118 pm 59	444 pm 444	296 pm 118	82 pm 59	233 pm 233	74 pm 47			163 pm 45	327 pm 45	1272 pm 136	284 pm 45	116 pm 27
3452.89	NiI					142 pm 27	263 pm 87						2392 pm 1674			358 pm 239		2153 pm 717		552 pm 157	789 pm 263	177 pm 59		118 pm 118	85 pm 59			15 pm 4			145 pm 45	445 pm 181	223 pm 36	37 pm 13
3458.46	NiI					613 pm 27							5263 pm 956							31578 pm 31578			474 pm 296					45 pm 18		136 pm 90	490 pm 72		270 pm 36	88 pm 13
3461.65	NiI	132 pm 4	41 pm 13	30 pm 13	30 pm 13	781 pm 27	1087 pm 52	54 pm 12	131 pm 11				5502 pm 956	1000 pm 90	60 pm 60	1602 pm 95		2511 pm 717		5289 pm 52	4026 pm 526	296 pm 88	918 pm 296	998 pm 118	165 pm 29	436 pm 66	282 pm 71	100 pm 27	200 pm 36	445 pm 45	890 pm 36	2363 pm 181	570 pm 45	552 pm 18
3465.86	FeI	18 pm 4						26 pm 12					1196 pm 1196							210 pm 52	210 pm 210	59 pm 59				59 pm 59						136 pm 136		61 pm 18
3472.55	NiI					250 pm 36	456 pm 87		95 pm 23				956 pm 717			239 pm 119		1674 pm 956		1263 pm 131	1184 pm 526			533 pm 296		126 pm 66		27 pm 9	63 pm 36	109 pm 54	172 pm 36	663 pm 181	98 pm 36	119 pm 18
3475.45	FeI	37 pm 4						36 pm 15								71 pm 71				184 pm 52	131 pm 131		592 pm 592									236 pm 136	49 pm 36	740 pm 18
3490.57	FeI	78 pm 9							81 pm 81				478 pm 478			287 pm 167		1674 pm 717		921 pm 131	1105 pm 526			213 pm 148								290 pm 136	198 pm 45	72 pm 27
3492.96	NiI	57 pm 4	39 pm 22			365 pm 27	438 pm 52	35 pm 15	59 pm 7		110 pm 29	148 pm 44	2631 pm 717	454 pm 90		693 pm 71		2870 pm 478		3052 pm 52	2394 pm 526	148 pm 59	859 pm 148	1034 pm 118	127 pm 59	263 pm 49	165 pm 71		36 pm 27	163 pm 45	327 pm 36	1572 pm 136	242 pm 27	137 pm 18
3510.34	NiI					218 pm 45	438 pm 140	12 pm 12				72 pm 29	956 pm 478			119 pm 119		1315 pm 478		842 pm 52	842 pm 263		296 pm 148							109 pm 54	181 pm 90	509 pm 136
3515.05	NiI	84 pm 4	27 pm 13	19 pm 18	17 pm 13	449 pm 45	561 pm 52	30 pm 12	55 pm 7	4 pm 4		152 pm 29	2392 pm 956	696 pm 60		837 pm 71		3708 pm 478		4184 pm 52	3578 pm 394	237 pm 88	296 pm 296	936 pm 118	56 pm 56	216 pm 99	196 pm 47	38 pm 18	163 pm 45	263 pm 45	509 pm 36	2090 pm 136	336 pm 27	342 pm 18
3524.54	NiI	165 pm 4	43 pm 13			1109 pm 45	1403 pm 52	50 pm 15	122 pm 4		88 pm 44	142 pm 20	5023 pm 956	1121 pm 90	45 pm 15	1961 pm 95		4784 pm 478		2263 pm 52	1736 pm 263	474 pm 88	414 pm 296	1807 pm 118	112 pm 59	186 pm 49	354 pm 71	100 pm 18	154 pm 54	436 pm 45	909 pm 45	3636 pm 181	664 pm 36	777 pm 18
3565.38	FeI	39 pm 7																			921 pm 789				74 pm 59							363 pm 181
3566.37	NiI	11 pm 7				52 pm 27	70 pm 70				111 pm 59		717 pm 717			287 pm 143				1157 pm 131	921 pm 263		800 pm 148	355 pm 355		66 pm 66	78 pm 47	23 pm 9	45 pm 36	90 pm 63	90 pm 45	727 pm 136		51 pm 18
3570.10	FeI	60 pm 4						16 pm 12					478 pm 239					1555 pm 478		526 pm 78	263 pm 131			266 pm 118	68 pm 59	116 pm 66						609 pm 90	75 pm 36	140 pm 18
3571.86	NiI	16 pm 4				104 pm 36	140 pm 87		9 pm 9									598 pm 478		342 pm 52	421 pm 210		651 pm 296					10 pm 9			63 pm 45	300 pm 181
3581.19	FeI	186 pm 4	55 pm 13	15 pm 13				22 pm 12					1674 pm 956			263 pm 119		2033 pm 956		1105 pm 52	947 pm 394	74 pm 29	918 pm 296	346 pm 118		90 pm 90					45 pm 27	963 pm 90	172 pm 27	196 pm 18
3608.86	FeI	19 pm 4												212 pm 90				1196 pm 956		421 pm 105	394 pm 263	29 pm 29	325 pm 325	207 pm 148	100 pm 88						36 pm 27	272 pm 181	67 pm 36
3610.46	NiI	14 pm 4				123 pm 36	105 pm 52	19 pm 12					956 pm 478					717 pm 717		236 pm 78		88 pm 44	355 pm 148	346 pm 177		66 pm 66					27 pm 27	245 pm 181		69 pm 18
3612.74	NiI	13 pm 9				109 pm 45		20 pm 12												236 pm 78	342 pm 263											90 pm 90
3618.77	FeI	45 pm 4	10 pm 9						28 pm 28				717 pm 717			143 pm 119				368 pm 131	394 pm 210											181 pm 136		50 pm 9
3619.39	NiI	55 pm 4	30 pm 22			2609 pm 36	315 pm 35	80 pm 12	35 pm 11		85 pm 29	59 pm 29	1913 pm 239	363 pm 181	21 pm 9	717 pm 143		2511 pm 717		1947 pm 52	1684 pm 263	88 pm 29	325 pm 177	728 pm 118	65 pm 59	260 pm 66	102 pm 47	22 pm 18	63 pm 36	145 pm 36	354 pm 27	1563 pm 90	447 pm 54	174 pm 9
3631.46	FeI	39 pm 4									64 pm 14	28 pm 17				95 pm 71		239 pm 239		342 pm 78	526 pm 131	59 pm 29		257 pm 88								336 pm 90	36 pm 36	80 pm 9
3647.84	FeI	44 pm 4																717 pm 717		368 pm 105	263 pm 131	74 pm 29		240 pm 177	77 pm 59	79 pm 66						309 pm 90	51 pm 36	49 pm 9
3679.91	FeI	50 pm 9	16 pm 9			109 pm 36	70 pm 70													763 pm 184	578 pm 394	103 pm 29										209 pm 90		184 pm 45
3687.46	FeI	14 pm 5																		184 pm 131
3705.57	FeI	36 pm 9	12 pm 9					27 pm 9												315 pm 105	210 pm 210	59 pm 44		154 pm 118		66 pm 49						127 pm 90	171 pm 45	145 pm 9
3709.25	FeI	24 pm 9																		657 pm 131	657 pm 263			423 pm 118								281 pm 90
3719.93	FeI	658 pm 9	114 pm 13	34 pm 13	22 pm 13	190 pm 36	105 pm 35	41 pm 12	47 pm 14	4 pm 1	117 pm 29	87 pm 29	5263 pm 717	545 pm 90	24 pm 15	622 pm 119		1674 pm 717		3105 pm 78	2894 pm 526	296 pm 29	622 pm 148	962 pm 237	91 pm 59	333 pm 83	98 pm 47	13 pm 9	54 pm 18		118 pm 18	2318 pm 181	426 pm 36	1230 pm 18
3722.56	FeI	50 pm 9	18 pm 13	9 pm 8				7 pm 7	33 pm 7				358 pm 358	333 pm 151		311 pm 95		1913 pm 956		578 pm 52	578 pm 263	59 pm 29		367 pm 296		90 pm 66						490 pm 181	225 pm 45	68 pm 13
3733.32	FeI																															181 pm 136		48 pm 9
3734.86	FeI	265 pm 9	65 pm 18	14 pm 14	6 pm 5	79 pm 27	26 pm 26	75 pm 9	38 pm 11	1 pm 1	94 pm 14	83 pm 29	2153 pm 478	303 pm 121	12 pm 9	478 pm 119		1913 pm 717		1999 pm 52	1631 pm 394	103 pm 29	414 pm 148	610 pm 118	109 pm 59	199 pm 49	105 pm 47				90 pm 27	1336 pm 181	324 pm 45	331 pm 18
3737.13	FeI	282 pm 9	94 pm 9	26 pm 13	25 pm 13		35 pm 35	45 pm 12	43 pm 7	2 pm 1	73 pm 14	62 pm 29	2153 pm 478	454 pm 90	15 pm 9	311 pm 143		2631 pm 478		1342 pm 52	1210 pm 263	177 pm 29	711 pm 148	847 pm 118	130 pm 59	136 pm 66	69 pm 47				90 pm 27	1500 pm 136	367 pm 36	533 pm 18
3745.56	FeI	140 pm 9				62 pm 27		14 pm 12			87 pm 29		358 pm 358	60 pm 60	12 pm 9	574 pm 239			2033 pm 717	1605 pm 184	1578 pm 1052		503 pm 177	1057 pm 296	82 pm 59	199 pm 99		9 pm 4		36 pm 27	63 pm 45	545 pm 363		290 pm 22
3745.90	FeI	42 pm 9	23 pm 18																		710 pm 263	44 pm 29										363 pm 272		68 pm 13
3748.26	FeI	43 pm 9							11 pm 7				956 pm 478			215 pm 95		956 pm 717	334 pm 119	394 pm 105	394 pm 184	74 pm 44				96 pm 66				27 pm 27		509 pm 181	110 pm 45	140 pm 13
3749.49	FeI	128 pm 7	42 pm 13			56 pm 27		10 pm 10	35 pm 7		85 pm 59	74 pm 29	717 pm 358	181 pm 121		239 pm 95		1315 pm 478	574 pm 119	1157 pm 52	868 pm 131	118 pm 44		391 pm 118		73 pm 49					63 pm 45	1045 pm 136	219 pm 63	208 pm 18
3758.23	FeI	67 pm 7	10 pm 9			39 pm 27		12 pm 9			63 pm 29	51 pm 23	1674 pm 1196	60 pm 60	12 pm 9			1196 pm 956	741 pm 478		1105 pm 263	59 pm 29	533 pm 296			166 pm 83						563 pm 181	130 pm 54	102 pm 18	83 pm 18
3760.05	FeI	63 pm 13				149 pm 45										478 pm 239								613 pm 237									108 pm 54	36 pm 18
3763.79	FeI	31 pm 13		17 pm 13												95 pm 95		311 pm 311	334 pm 119	368 pm 78	368 pm 184	103 pm 44										336 pm 136		58 pm 18	71 pm 18
3767.19	FeI	45 pm 13																	741 pm 119	999 pm 78	789 pm 263	88 pm 44		438 pm 118				18 pm 13				572 pm 181	243 pm 54	46 pm 22	57 pm 22
3775.57	NiI					93 pm 36	122 pm 70	33 pm 15									717 pm 717	2033 pm 478	382 pm 191		473 pm 157	44 pm 44		263 pm 148								118 pm 90			80 pm 22
3783.53	NiI					184 pm 45	263 pm 105										1674 pm 956	1674 pm 717	956 pm 956	1131 pm 131	1105 pm 263	44 pm 44		346 pm 296								227 pm 136		50 pm 22
3795.00	FeI							20 pm 12														29 pm 29													80 pm 22
3799.55	FeI	30 pm 13		13 pm 13				10 pm 10											334 pm 119	368 pm 78		59 pm 29										163 pm 72
3807.14	NiI					188 pm 45		29 pm 15					1196 pm 717																		72 pm 72			81 pm 27	85 pm 27
3815.84	FeI	24 pm 9						21 pm 9											119 pm 119	210 pm 105		44 pm 29		157 pm 148	71 pm 59							72 pm 63		54 pm 27	36 pm 18
3820.43	FeI	223 pm 9	41 pm 36	36 pm 31	36 pm 31	54 pm 36		26 pm 12			88 pm 44	88 pm 29	1794 pm 478	242 pm 121	24 pm 18	478 pm 239			1435 pm 478	1815 pm 105	1605 pm 526	133 pm 59	355 pm 148	960 pm 296	109 pm 59						63 pm 63	1518 pm 181	248 pm 54	277 pm 13	230 pm 13
3824.44	FeI	83 pm 9	18 pm 13								47 pm 23	31 pm 14	358 pm 358	90 pm 90		167 pm 95		1196 pm 956	406 pm 95	552 pm 78	342 pm 157	59 pm 29	562 pm 296								45 pm 45	309 pm 45		157 pm 13	133 pm 13
3825.88	FeI	84 pm 9	18 pm 13					6 pm 6			32 pm 14	25 pm 14				95 pm 47			430 pm 95	526 pm 78	473 pm 131											418 pm 45		177 pm 18	161 pm 18
3827.82	FeI															71 pm 71																		24 pm 13
3834.22	FeI	35 pm 9									41 pm 23	44 pm 23				191 pm 71			454 pm 95	526 pm 263	526 pm 131											209 pm 45			90 pm 18
3840.44	FeI	14 pm 9																			842 pm 263													27 pm 13
3856.37	FeI																																	140 pm 22	101 pm 27
3858.30	NiI					221 pm 45					45 pm 14	71 pm 29												954 pm 118										98 pm 13	90 pm 22
3859.91	FeI																																	970 pm 18	870 pm 36
3878.57	FeI	39 pm 9	30 pm 9	7 pm 6	7 pm 6			11 pm 9	40 pm 11				358 pm 358	242 pm 90	4 pm 3	478 pm 239	2272 pm 1196	1913 pm 956	645 pm 239	605 pm 105	394 pm 131	44 pm 29	592 pm 592			123 pm 49								71 pm 13	66 pm 18
3886.28	FeI	161 pm 9	85 pm 13	36 pm 13	39 pm 13		26 pm 26	56 pm 12	126 pm 59		80 pm 23	80 pm 29	1435 pm 478	727 pm 121		909 pm 239	5023 pm 1913		1555 pm 478			148 pm 29	148 pm 148	829 pm 148	130 pm 59	283 pm 66						1163 pm 272		277 pm 13	257 pm 18
3895.66	FeI																																	61 pm 9	33 pm 18
3899.71	FeI																		239 pm 239															223 pm 13	209 pm 18
3902.95	FeI																																	448 pm 13	516 pm 18
3920.26	FeI																		693 pm 239															78 pm 13	61 pm 18
3922.91	FeI																		645 pm 239															102 pm 13	85 pm 18
3930.30	FeI										18 pm 14	35 pm 14							1052 pm 478							119 pm 66								106 pm 13	65 pm 18
4045.81	FeI																																	57 pm 9	63 pm 18
4063.59	FeI																																	31 pm 13	27 pm 18
4071.74	FeI																																	50 pm 13	19 pm 13
4132.06	FeI																																	31 pm 13
4216.18	FeI																																	69 pm 18	18 pm 9
4250.79	FeI																																	57 pm 27	50 pm 18
4260.47	FeI																																		17 pm 9
4282.40	FeI																																		40 pm 18
4307.90	FeI																																		20 pm 9
4325.76	FeI																		502 pm 239															31 pm 18	20 pm 9
4375.93	FeI																																	963 pm 22	96 pm 22
4383.54	FeI																		430 pm 71															111 pm 18	90 pm 27
4404.75	FeI																		143 pm 47															110 pm 13	100 pm 18
4427.30	FeI																																	45 pm 22	53 pm 18
4461.65	FeI																																	88 pm 45	43 pm 18
